# Supplementary material for: Design and Synthesis of Novel Angular 4,5-Pyranocoumarin Fluorescent Probe for detecting hydrazine and and its applications
Source: Research Square preprint supplement (doi:10.21203/rs.3.rs-6756101/v1), 2025-06-09

**2a**

Chemical Formula: C22H18ClO7

Exact Mass: 442.85

Molecular Weight: 465.07065


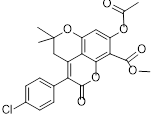
**
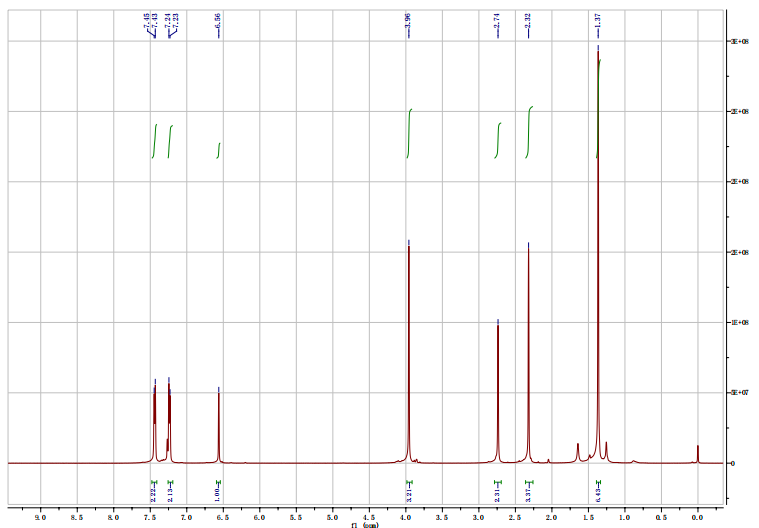
**


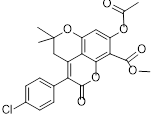
**
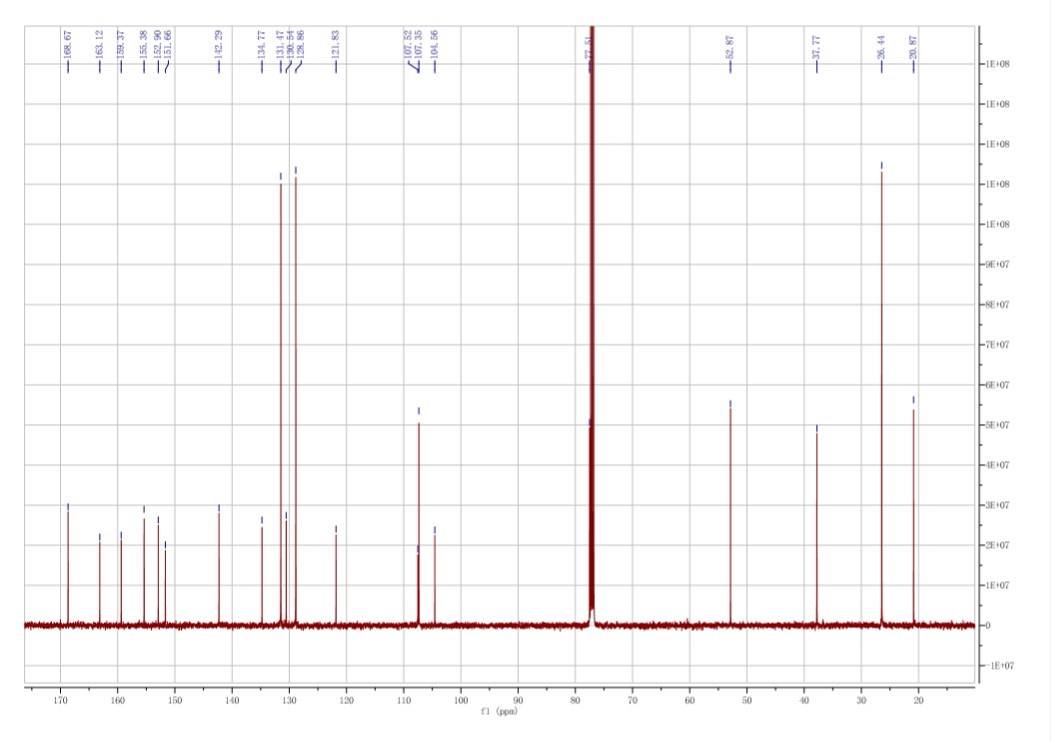
**

**2b**

Chemical Formula: C22H18ClO7

Exact Mass: 544.10

Molecular Weight: 567.0845.


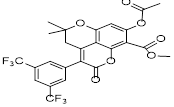
**
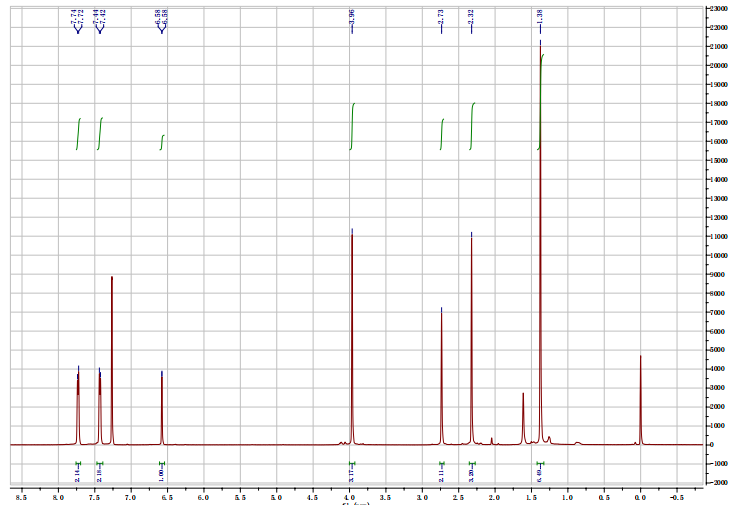
**


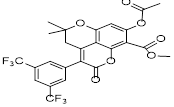
**
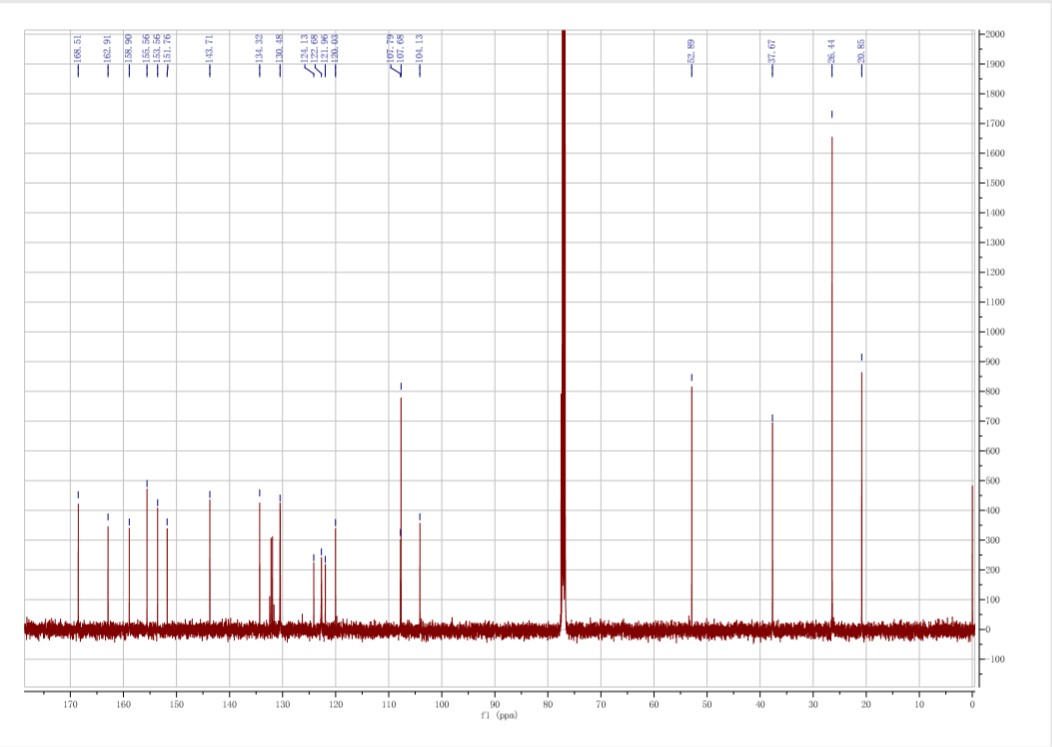
**

**2c**

Chemical Formula: C25H22O9

Exact Mass: 466.44

MolecularWeight: 489.1143


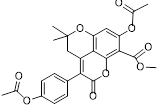
**
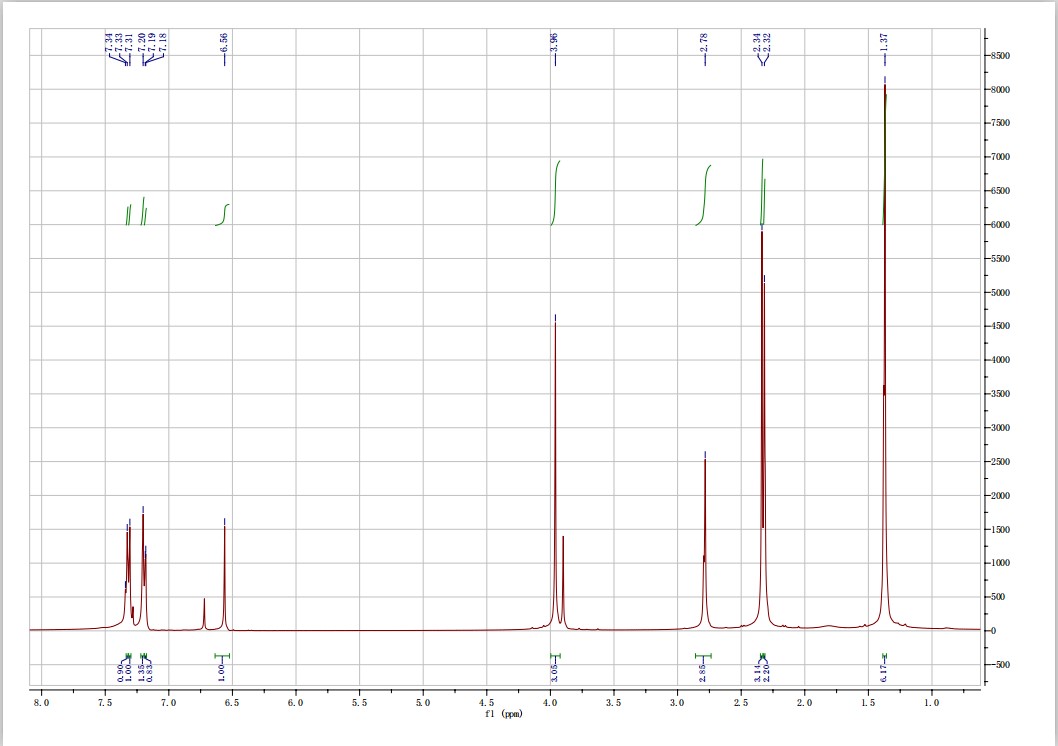
**


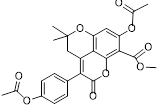
**
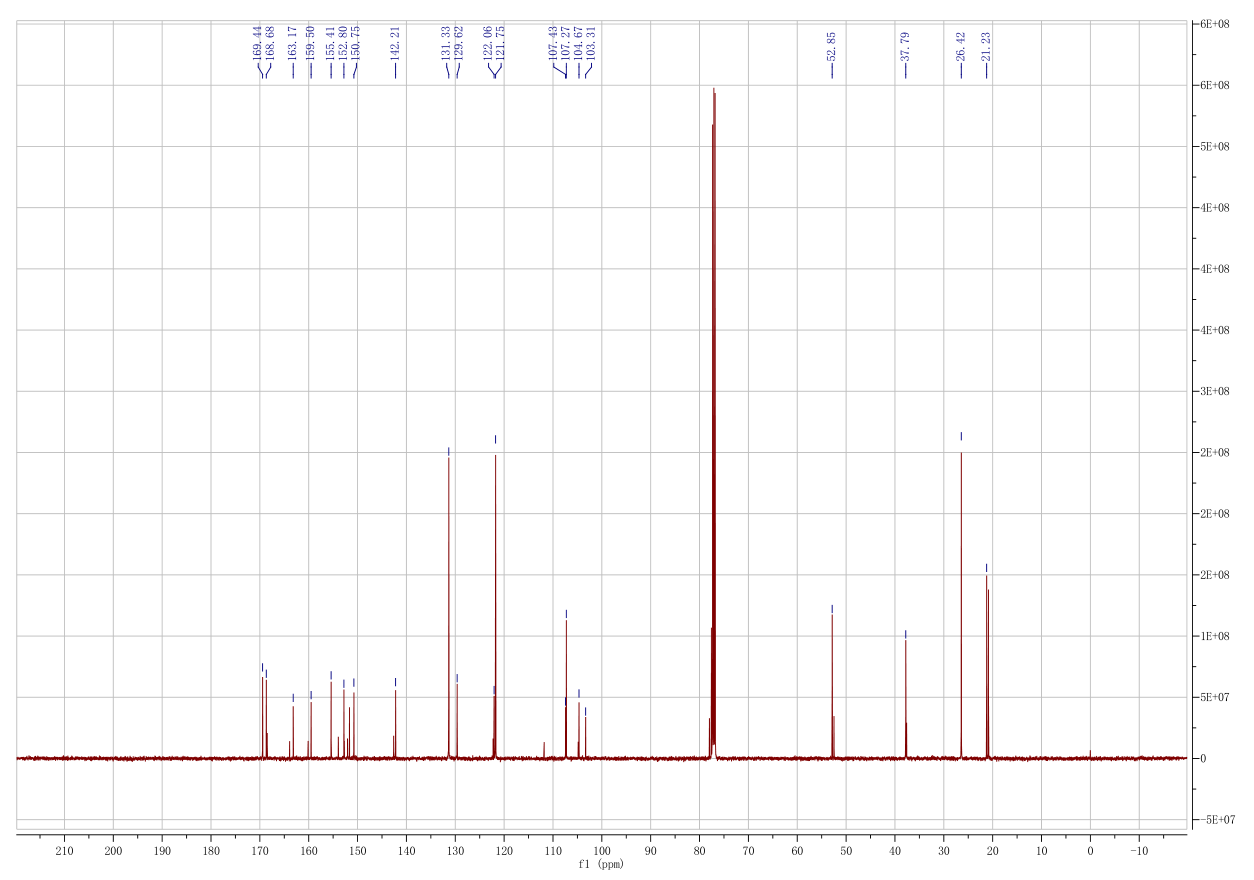
**

**3a**

Chemical Formula: C21H17ClO6

Exact Mass: 400.81

Molecular Weight: 401.0784


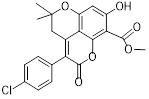
**
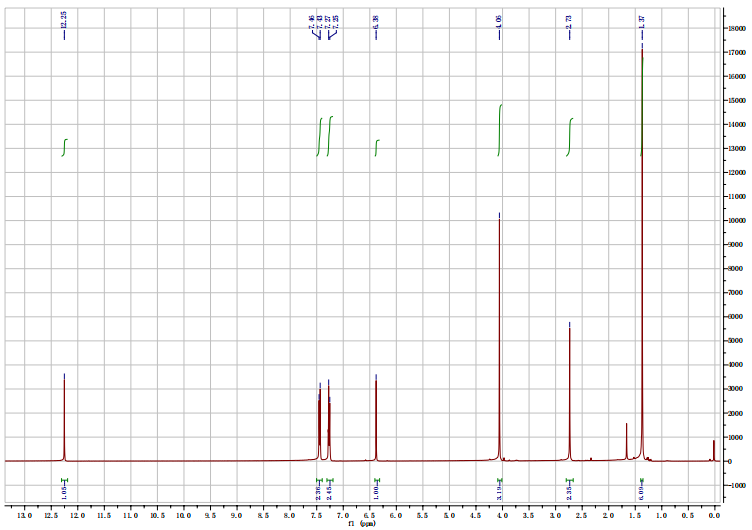
**


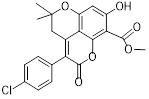
**
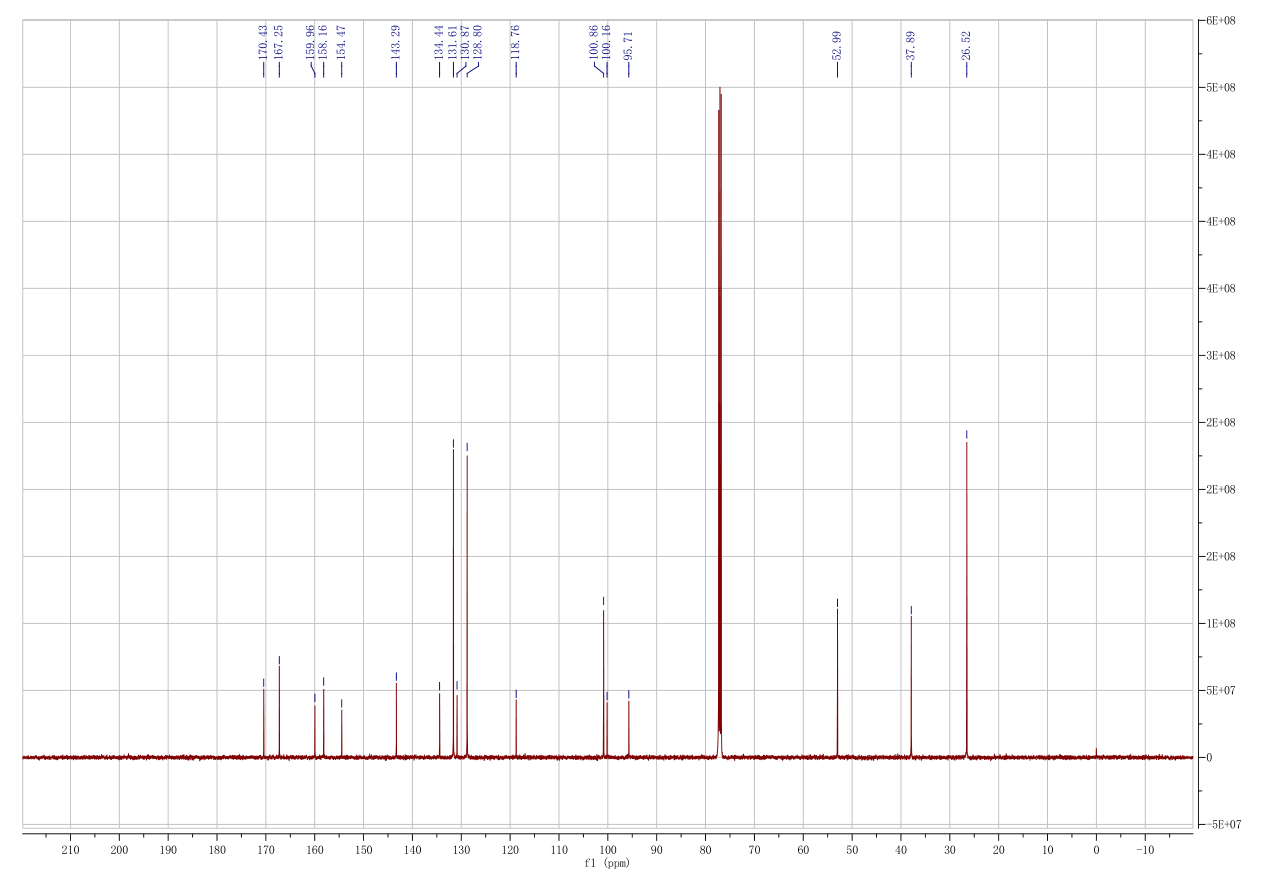
**

**3b**

Chemical Formula: C23H16F6O6

Exact Mass: 502.37

Molecular Weight: 503.0923


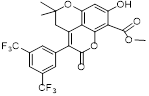
**
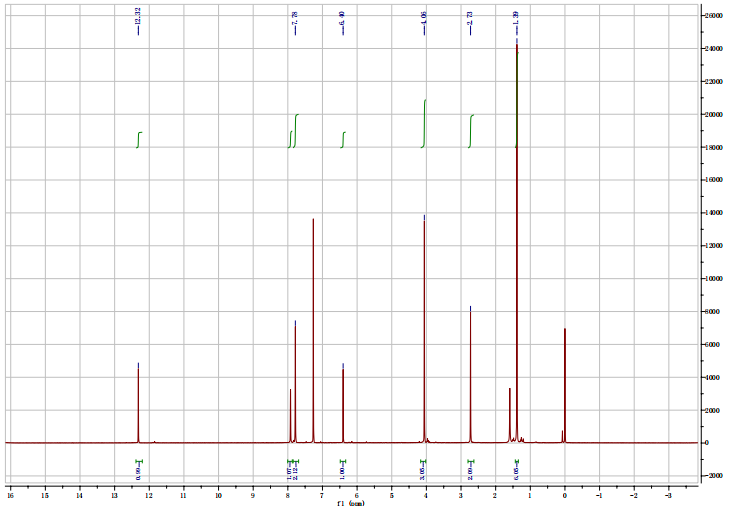
**


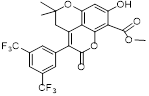
**
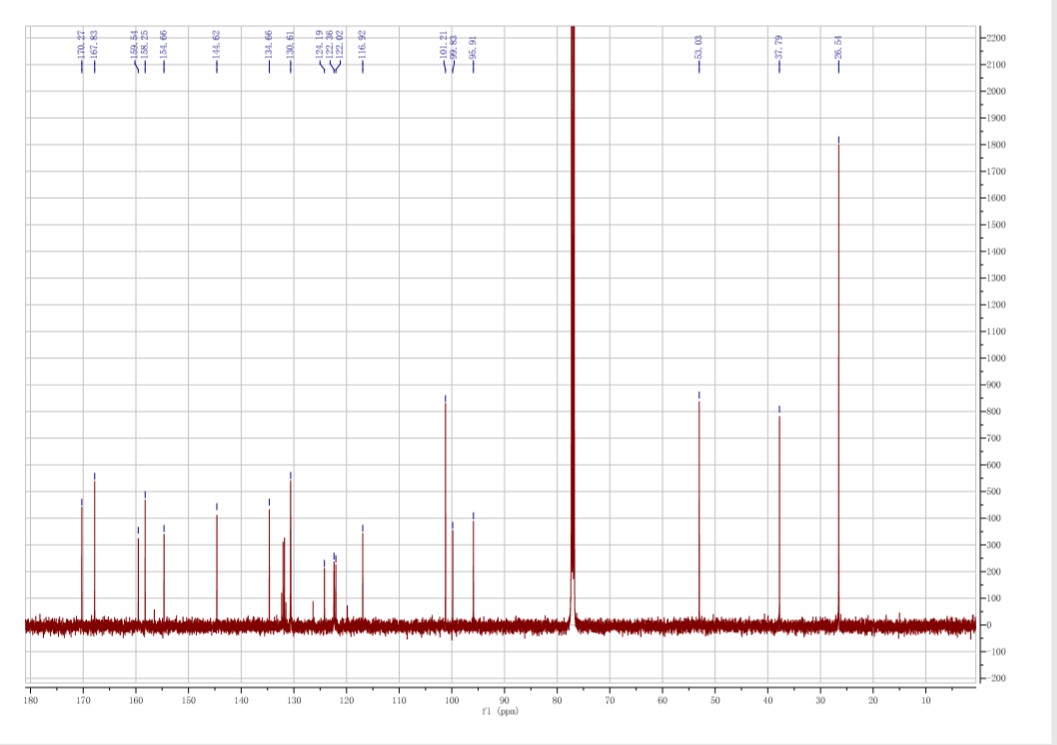
**

**3c**

Chemical Formula: C21H18O7

Exact Mass: 382.37

Molecular Weight: 383.1125


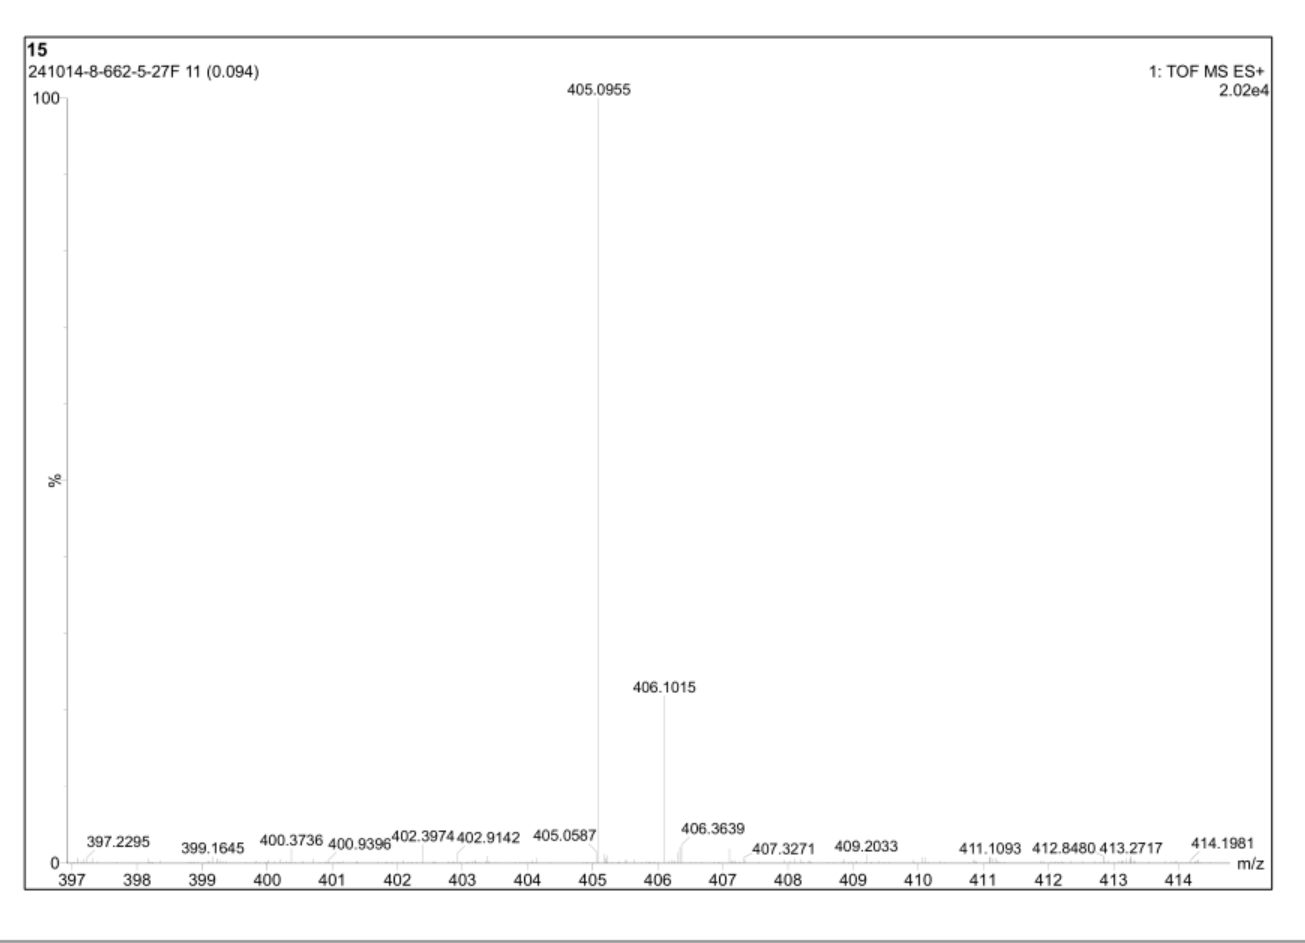


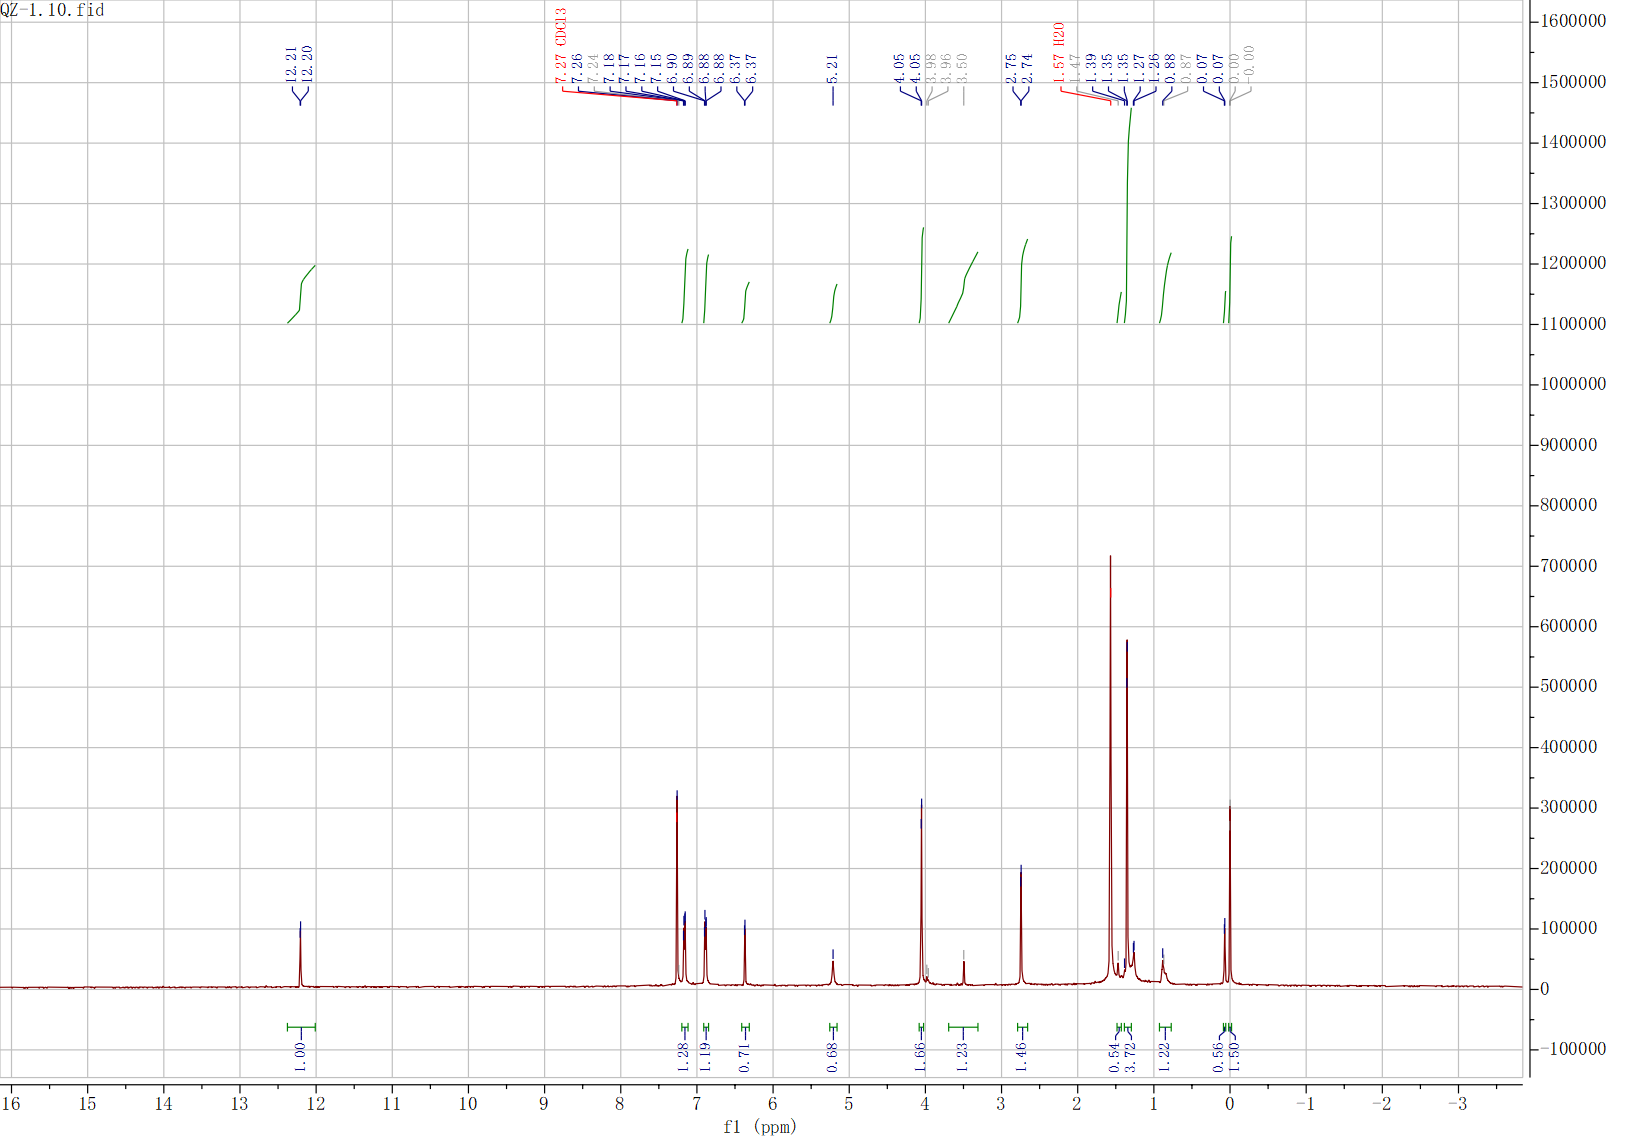

Supplement: Supplementary file 1 [file e013798da1f702b058e547d0.docx]
